# Supplementary material for: The Personal Human Oral Microbiome Obscures the Effects of Treatment on Periodontal Disease
Source: PubMed Central journal article supplement (PMC3906071; doi:10.1371/journal.pone.0086708), 2014-01-29
Supplement: pone.0086708.s002.pdf [file pone.0086708.s002.pdf]

| <b>Disease classification</b> | <b>Number of patients</b> |
|-------------------------------|---------------------------|
| Healthy controls              | 4                         |
| Gingivitis                    | 23                        |
| Mild-moderate periodontitis   | 12                        |
| Severe periodontitis          | 1                         |
