# Supplementary material for: The Personal Human Oral Microbiome Obscures the Effects of Treatment on Periodontal Disease
Source: PubMed Central journal article supplement (PMC3906071; doi:10.1371/journal.pone.0086708), 2014-01-29
Supplement: pone.0086708.s003.pdf [file pone.0086708.s003.pdf]

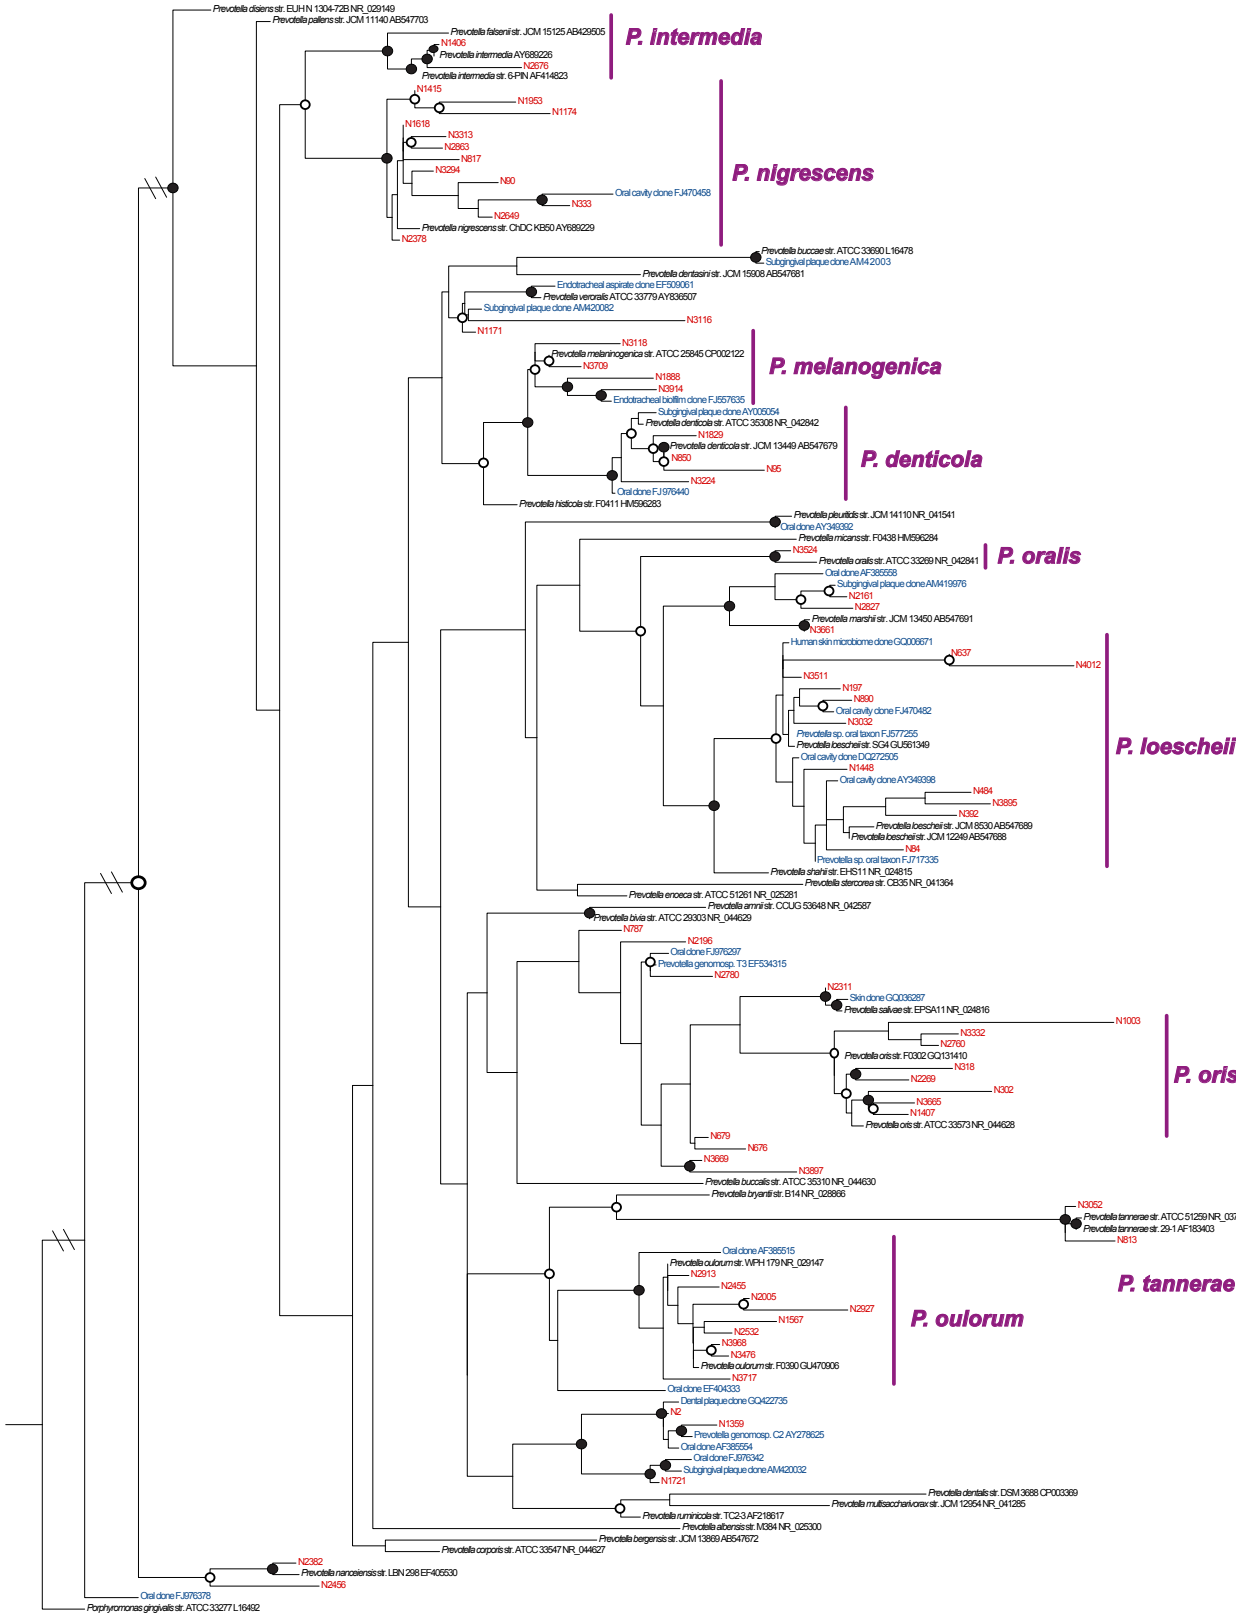

**P. intermedia**

**P. nigrescens**

**P. melanogenica**

**P. denticola**

**P. oralis**

**P. loeschei**

**P. oris**

**P. tannerae**

**P. ulorum**
