# Supplementary material for: The Personal Human Oral Microbiome Obscures the Effects of Treatment on Periodontal Disease
Source: PubMed Central journal article supplement (PMC3906071; doi:10.1371/journal.pone.0086708), 2014-01-29

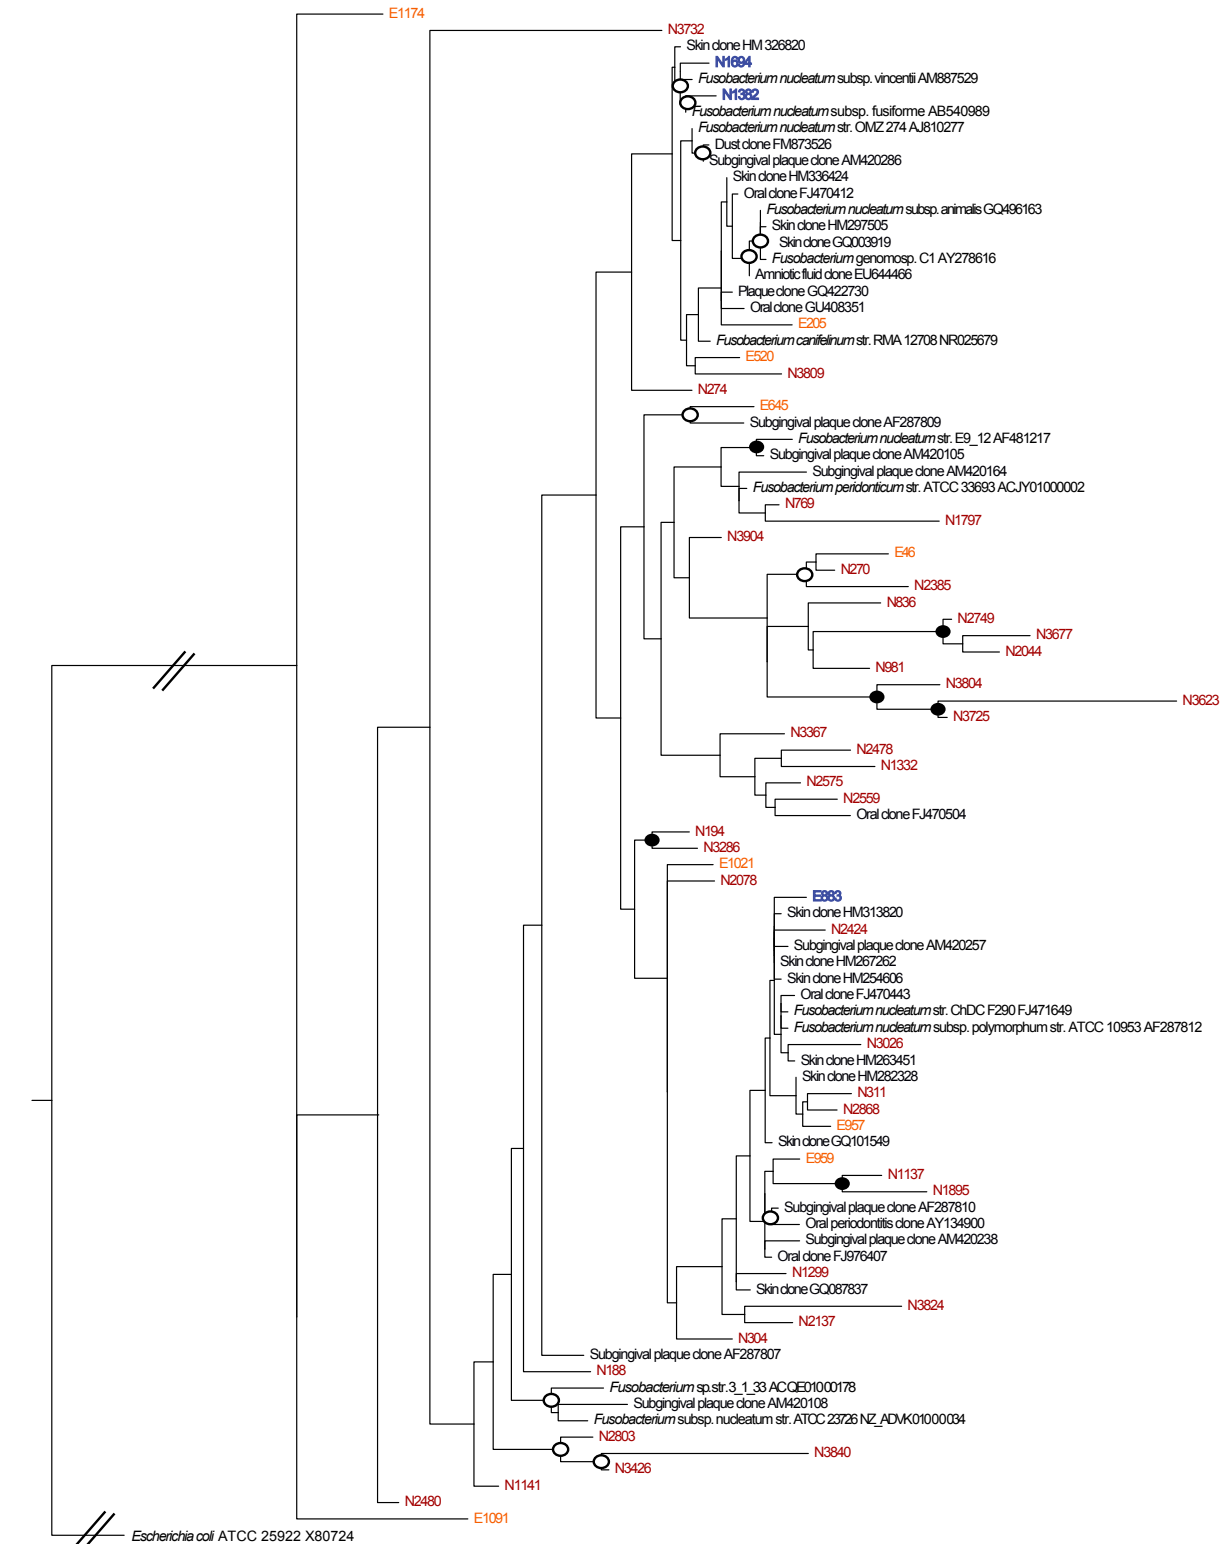

Supplement: pone.0086708.s004.pdf [file pone.0086708.s004.pdf]
